# Supplementary material
Source: PubMed Central journal article supplement (PMC2610063)
Supplement: rsbl20080052s28.pdf [file rsbl20080052s28.pdf]

## Performance of climate envelope models in retrodicting recent changes in bird population size from observed climatic change – SUPPLEMENTARY MATERIAL

Rhys E. Green, Yvonne C. Collingham, Stephen G. Willis,  
Richard D. Gregory, Ken W. Smith and Brian Huntley

### *(a) Source of bird data and limitations*

The Rare Breeding Birds Panel collates information submitted by ornithologists on breeding by a specified set of bird species in the United Kingdom (UK) and compiles a standard annual report. Information is mainly contributed by amateur ornithologists through county bird recorders but is supplemented, for some species, by records from wardens of nature reserves and, in some years, by special surveys of particular species, including those organised or conducted by professionals. Many of the records are the result of opportunistic discoveries of rare birds by amateur ornithologists, followed up by subsequent checking and monitoring. Because the data are not the outcome of a standardised, systematic programme of fieldwork, it is impossible to say what proportion of the true population of each species is detected and reported. We believe it likely that, on average, this proportion has increased over the years included in our analysis because birdwatchers have become more numerous and wide-ranging and because the number of professionals who contribute data (e.g. nature reserve wardens) has also increased. Hence, we do not claim that the trends in reported numbers presented in this paper measure the true trend in numbers: we believe that the true trend will usually be more negative than that reported. However, we suggest that trends over time in detection and reporting probability are broadly similar for the species considered, and therefore that the variation among species in trends in reported numbers will be strongly correlated with that of trends in true population.

### *(b) Selection of species*

We wished to restrict our analysis to terrestrial birds and therefore excluded the one seabird in the database, *Sterna dougallii*. We excluded *Loxia pytyopsittacus* because the effort and ability of observers to distinguish it from *L. curvirostra* and *L. scotica* has changed too markedly during the study period for us to take its apparent population trend as being comparable with those of the other species. We excluded all eight species of raptors (Accipitriformes and Falconiformes) from the analysis because of marked changes in status that were clearly caused by factors other than climatic change; their populations have been recovering after alleviation of the earlier adverse effects of direct persecution and/or pesticide contamination (Newton 1979). Two of these species (*Haliaeetus albicilla* and *Milvus milvus*) also have expanding populations in the UK derived from recent reintroductions. We excluded the duck *Bucephala clangula*, which only rarely uses natural nest sites in the UK, because its breeding population has been strongly affected by special efforts to provide nestboxes. Although some of the other species are considered to have benefited from conservation management (Aebischer, Green & Evans 2000), we considered that the effects on their population trends were unlikely to have been as marked as those considered above and retained them in the analysis.

We also excluded from further analysis the eight species (*Gavia immer*, *Himantopus himantopus*, *Tringa ochropus*, *Larus minutus*, *Upupa epops*, *Luscinia svecica*, *Eremophila alpestris* and *Hippolais icterina*) for which the average number

of pairs (or equivalent) recorded per year for the period 1980 – 2004 was below one pair per year, because we believed the data for these were too sparse for the calculation of a meaningful population trend. The remaining 42 species are listed in table S1.

Of the 42 species listed and used in our analyses, one species appears as an outlier on Figure 2(a) and 2(b). We would exclude such an outlier if there was reason to believe that the unusual measured value may be due to an undetected measurement error. However, the outlying species was *Egretta garzetta*, a large, conspicuous, easily-identified species that has colonised parts of the UK where there are many birdwatchers. Hence, we consider it very unlikely that its observed population trend has been measured incorrectly. Nonetheless, we explored the effect of this species on our results by computing the simple standardised regression coefficient between POPT and CST after excluding *E. garzetta*. Exclusion of *E. garzetta* changed the regression coefficients and their statistical significance in different directions according to whether or not the 11 species with mean population levels of less than 5 pairs were also excluded ( $\beta = 0.162$ ,  $p = 0.1558$  for all species except *E. garzetta*;  $\beta = 0.486$ ,  $p = 0.0032$  for species with mean populations of more than 5 pairs except *E. garzetta*; cf.  $\beta$  and  $p$  values in Table 1). Smaller effects of excluding *E. garzetta* were found for the regression of POPT on LAT ( $\beta = -0.304$ ,  $p = 0.0267$  for all species except *E. garzetta*;  $\beta = -0.386$ ,  $p = 0.0176$  for species with mean populations of more than 5 pairs except *E. garzetta*). Hence, although we believe that the datum for *E. garzetta* should be retained for the reasons given above, our results remain broadly similar if it is excluded.

### **(c) Mean latitude of the European range**

We calculated the mean of the latitude of the centres of each 50-km UTM square in which a species was simulated to occur under 1961 – 1990 mean climate conditions using the climate response surface (CRS) model fitted to the European Bird Census Council distribution data (Hagemeijer & Blair 1997; Huntley *et al.* 2007). This latitude was similar to that obtained by averaging the latitudes of the squares in which a species was recorded. However, we considered the mean latitude of the simulated range superior because it allows, to some extent, for incomplete coverage of eastern Europe. This covariate (LAT) is expressed in degrees of north latitude.

### **(d) Mean body mass, breeding habitat and migratory behaviour**

We obtained data on body mass in grams from Dunning (1993). Where he gives information for males and females separately, we averaged them. We took the natural logarithm of mean body mass (LMS) as the covariate in our analyses.

We based our habitat classification (HAB) upon that of Tucker and Evans (1997), but simplified it to reduce its nine categories to three and adapted it so that it referred to the breeding season only. We used accounts of habitat in Snow & Perrins (1997) and Hagemeijer & Blair (1997) to adapt the classification. In particular, we assigned *Cygnus cygnus*, *Aythya marila*, *Anas acuta*, *Anas querquedula*, *Melanitta nigra*, *Grus grus*, *Limosa limosa*, *Calidris temminckii*, *Philomachus pugnax*, *Tringa glareola* and *Phalaropus lobatus* to the wetland category on the basis of the emphasis given in these accounts to pools, marshes and other damp habitats as important components of the breeding habitat. Although we initially intended to have a separate category for birds of agricultural land, only three species would have been so classified, so we included these in the open habitat category. The three habitat classes were: (1) wetland, comprising coastal and inland wetlands; (2) open

habitats, comprising tundra, shrubland, rocky habitats, agricultural land and grassland; and (3) forest, comprising boreal and temperate forests.

We classified species according to their migratory behaviour (MIG) in western Europe, as mapped by Snow & Perrins (1997). Our three categories were: (1) resident; (2) partial and short distance migrants with >50% of the population remaining within the western Palearctic region in winter; and (3) long distance migrants with >50% of the population moving beyond the western Palearctic region in winter. We assigned *Limosa limosa* to the long distance migrant category because, of the two subspecies with widely separated main breeding distributions that breed in the UK, the trans-Saharan migrant, *L. l. limosa*, predominates.

**(e) Proximity to the UK of other parts of the European breeding range of a species**

We calculated a measure of proximity to the UK (PRX) of 50-km UTM squares outside the UK from which a species was recorded as present in the atlas of Hagemeijer & Blair (1997) by obtaining the sum of the reciprocals of the geodesic distances (in km) between the centres of all such occupied squares and the centre of a given 50-km in the UK. We then averaged this measure across all UTM squares in the UK.

**(f) Climate data**

The bioclimate variables used in our analysis were derived from a compilation of meteorological data for the period 1970–2002 (Mitchell & Jones 2005). We interpolated values for monthly mean temperatures, mean monthly precipitation and monthly mean proportion of potential sunshine received ('cloudiness') for the geographic mid-point of each of the 50-km UTM grid squares with more than half of its area in the UK. The bioclimatic variables were then calculated for each square in each calendar year from these data using the approach and software developed by Prentice *et al.* (1992) and previously applied and described by Huntley *et al.* (1995).

We calculated climate suitability trends as means for the entire UK and used these in the analyses reported. However, these national trends might not be representative of trends in the part of the country occupied by a species, or most likely to be colonised by a species because of proximity to its continental range. In order to explore the extent to which this might affect our results we repeated our analyses using mean climatic suitability trends calculated separately for the north and south of the UK. For this purpose we divided the UTM grid squares along the grid line at *ca.* 53° N extending from Anglesey to Lincolnshire. We allocated each species to one of three categories: (1) at least two-thirds of breeding records in the south of the UK; (2) at least two-thirds of records in the north of the UK; (3) others. We then used the climate suitability trend calculated for the appropriate half of the UK for each species, using the CST for the whole of the UK for category (3) species. Doing this had little effect on the simple correlation coefficients between POPT and CST ( $r = 0.219$  (0.242) for all species;  $r = 0.461$  (0.478) for species with mean populations greater than 5 pairs; values in brackets for national mean trends). We therefore present the results for the national mean climate suitability trends (Table 1).

- Aebischer, N.J., Green, R.E. & Evans, A.D. 2000. From science to recovery: four case studies of how research has been translated into conservation action in the UK. In Aebischer, N.J., Evans, A.D., Grice, P.V. & Vickery, J.A. (eds) *Ecology and Conservation of Lowland Farmland Birds*. pp 43-54. Tring: British Ornithologists' Union.
- Dunning, J. B. 1993 *CRC handbook of avian body masses*. Boca Raton: CRC Press.
- Hagemeijer, E. J. M. & Blair, M. J. (eds) 1997 *The EBCC Atlas of European Breeding Birds: Their distribution and abundance*. London: T. & A. D. Poyser.
- Huntley, B., Berry, P. M., Cramer, W. P. & Mc Donald, A. P. 1995 Modelling present and potential future ranges of European higher plants using climate response surfaces. *Journal of Biogeography* **22**, 967-1001.
- Huntley, B., Green, R. E., Collingham, Y.C. & Willis, S.G. 2007 *A Climatic Atlas of European Breeding Birds*. Barcelona: Lynx Edicions.
- Mitchell, T.D. & Jones, P.D. 2005 An improved method of constructing a database of monthly climate observations and associated high-resolution grids. *International Journal of Climatology* **25**, 693-712.
- Newton, I. 1979 *Population Ecology of Raptors*. Berkhamsted, UK: Poyser.
- Prentice, I.C., Cramer, W., Harrison, S.P., Leemans, R., Monserud, R.A. & Solomon, A.M. 1992 A global biome model based on plant physiology and dominance, soil properties and climate. *Journal of Biogeography* **19**, 117-134.
- Snow, D. W. & Perrins, C. M. 1997 *The Birds of the Western Palearctic, Concise Edition*. Oxford: Oxford University Press.
- Tucker G. M. & Evans, M. I. 1997 *Habitats for birds in Europe: a conservation strategy for the wider environment*. Cambridge, UK: BirdLife International.

**Table S1.** Bird species analysed, the units in which they were counted (BP – breeding pairs, CBP – confirmed breeding pairs, M – males, MXP – maximum pairs, MXT – maximum territories, NB – nests and broods, P – pairs, SM – singing males), years in which data were excluded because of poor or good coverage and years in which good coverage by national systematic surveys was allowed for in the regression model.

| Common name          | Scientific name                 | Units | Excluded:<br>poor | Excluded:<br>good | Modelled:<br>good     |
|----------------------|---------------------------------|-------|-------------------|-------------------|-----------------------|
| Red-necked grebe     | <i>Podiceps grisegena</i>       | MXP   |                   |                   |                       |
| Slavonian grebe      | <i>Podiceps auritus</i>         | BP    |                   |                   |                       |
| Black-necked grebe   | <i>Podiceps nigricollis</i>     | MXP   |                   |                   |                       |
| Bittern              | <i>Botaurus stellaris</i>       | SM    |                   |                   |                       |
| Little egret         | <i>Egretta garzetta</i>         | MXP   |                   |                   |                       |
| Spoonbill            | <i>Platalea leucorodia</i>      | MXP   |                   |                   |                       |
| Whooper swan         | <i>Cygnus cygnus</i>            | MXP   |                   |                   |                       |
| Pintail              | <i>Anas acuta</i>               | MXP   |                   |                   |                       |
| Garganey             | <i>Anas querquedula</i>         | MXP   |                   |                   |                       |
| Pochard              | <i>Aythya ferina</i>            | MXP   |                   |                   |                       |
| Scaup                | <i>Aythya marila</i>            | MXP   |                   |                   |                       |
| Common scoter        | <i>Melanitta nigra</i>          | MXP   |                   | 1995              |                       |
| Quail                | <i>Coturnix coturnix</i>        | MXP   |                   |                   |                       |
| Spotted crane        | <i>Porzana porzana</i>          | SM    |                   | 1999              |                       |
| Crane                | <i>Grus grus</i>                | P     | 2001              |                   |                       |
| Avocet               | <i>Recurvirostra avosetta</i>   | CBP   | 2001              |                   |                       |
| Stone curlew         | <i>Burhinus oedipnemus</i>      | CBP   | 2001              |                   | 1987–2004             |
| Temminck's stint     | <i>Calidris temminckii</i>      | MXP   |                   |                   |                       |
| Purple sandpiper     | <i>Calidris maritima</i>        | MXP   |                   |                   |                       |
| Ruff                 | <i>Philomachus pugnax</i>       | NB    |                   |                   |                       |
| Black-tailed godwit  | <i>Limosa limosa</i>            | MXP   |                   |                   |                       |
| Wood sandpiper       | <i>Tringa glareola</i>          | MXP   |                   |                   |                       |
| Red-necked phalarope | <i>Phalaropus lobatus</i>       | M     |                   |                   |                       |
| Mediterranean gull   | <i>Larus melanocephalus</i>     | MXP   |                   |                   |                       |
| Wryneck              | <i>Jynx torquilla</i>           | MSM   |                   |                   |                       |
| Woodlark             | <i>Lullula arborea</i>          | MXT   | 2001              |                   | 1986, 1997            |
| Black redstart       | <i>Phoenicurus ochruros</i>     | MXP   | 2001              |                   | 2000, 2002            |
| Fieldfare            | <i>Turdus pilaris</i>           | MXP   |                   |                   |                       |
| Redwing              | <i>Turdus iliacus</i>           | MXP   |                   |                   |                       |
| Cetti's warbler      | <i>Cettia cetti</i>             | MXP   | 2001              | 1996              |                       |
| Savi's warbler       | <i>Locustella luscinioides</i>  | MXP   |                   |                   |                       |
| Marsh warbler        | <i>Acrocephalus palustris</i>   | MXP   |                   |                   |                       |
| Dartford warbler     | <i>Sylvia undata</i>            | MXP   | 2001              |                   | 1974, 1984, 1994      |
| Firecrest            | <i>Regulus ignicapillus</i>     | MXP   |                   |                   |                       |
| Bearded tit          | <i>Panurus biarmicus</i>        | BP    | 2001              |                   | 1992, 2002            |
| Golden oriole        | <i>Oriolus oriolus</i>          | MXP   |                   |                   |                       |
| Red-backed shrike    | <i>Lanius collurio</i>          | MXP   |                   |                   |                       |
| Brambling            | <i>Fringilla montifringilla</i> | MXP   |                   |                   |                       |
| Serin                | <i>Serinus serinus</i>          | MXP   |                   |                   |                       |
| Scarlet rosefinch    | <i>Carpodacus erythrinus</i>    | MXP   |                   |                   |                       |
| Snow bunting         | <i>Plectrophenax nivalis</i>    | MXP   |                   |                   |                       |
| Cirl bunting         | <i>Emberiza cirlus</i>          | MXP   | 1999, 2001        |                   | 1989–1993, 1998, 2003 |

**Table S2.** Observed population trend (POPT), climate suitability trend (CST), mean latitude of the European range (LAT) and nuisance variable values (see ESM text and Materials and Methods) for the 42 bird species analysed.

| species                         | HAB    | MIG      | PRX   | LMS  | LAT   | CST      | POPT     |
|---------------------------------|--------|----------|-------|------|-------|----------|----------|
| <i>Podiceps grisegena</i>       | wet    | short    | 0.368 | 6.93 | 52.36 | -0.16795 | 0.06546  |
| <i>Podiceps auritus</i>         | wet    | short    | 0.230 | 6.12 | 60.20 | -0.08267 | -0.02732 |
| <i>Podiceps nigricollis</i>     | wet    | short    | 0.450 | 5.68 | 48.91 | -0.04437 | 0.04565  |
| <i>Botaurus stellaris</i>       | wet    | short    | 0.574 | 6.82 | 50.76 | -0.05098 | -0.01363 |
| <i>Egretta garzetta</i>         | wet    | long     | 0.185 | 6.21 | 44.91 | 0.02420  | 0.46140  |
| <i>Platalea leucorodia</i>      | wet    | long     | 0.052 | 7.55 | 45.15 | -0.05944 | 0.22420  |
| <i>Cygnus cygnus</i>            | wet    | short    | 0.253 | 9.14 | 63.78 | 0.03886  | 0.10710  |
| <i>Anas acuta</i>               | wet    | short    | 0.399 | 6.92 | 60.11 | -0.02933 | 0.01281  |
| <i>Anas querquedula</i>         | wet    | long     | 0.958 | 5.79 | 52.62 | -0.04339 | 0.01811  |
| <i>Aythya ferina</i>            | wet    | short    | 0.905 | 6.71 | 51.75 | -0.00446 | 0.05093  |
| <i>Aythya marila</i>            | wet    | short    | 0.197 | 6.85 | 65.90 | -0.18319 | 0.02676  |
| <i>Melanitta nigra</i>          | wet    | short    | 0.203 | 6.86 | 66.20 | 0.00082  | -0.04977 |
| <i>Coturnix coturnix</i>        | open   | long     | 1.286 | 4.57 | 48.06 | -0.01975 | 0.03519  |
| <i>Porzana porzana</i>          | wet    | long     | 0.730 | 4.36 | 52.61 | -0.07128 | 0.04935  |
| <i>Grus grus</i>                | wet    | short    | 0.491 | 8.61 | 57.58 | -0.23704 | 0.07456  |
| <i>Recurvirostra avosetta</i>   | wet    | short    | 0.208 | 5.72 | 47.80 | -0.04761 | 0.08505  |
| <i>Burhinus oedicephalus</i>    | open   | short    | 0.380 | 6.13 | 42.74 | 0.00216  | 0.05376  |
| <i>Calidris temminckii</i>      | wet    | long     | 0.097 | 3.14 | 66.40 | -0.12154 | -0.02144 |
| <i>Calidris maritima</i>        | open   | short    | 0.129 | 4.40 | 67.99 | -0.13189 | 0.00041  |
| <i>Philomachus pugnax</i>       | wet    | long     | 0.417 | 4.92 | 60.67 | -0.09961 | -0.06561 |
| <i>Limosa limosa</i>            | wet    | long     | 0.460 | 5.67 | 52.32 | -0.04274 | -0.00182 |
| <i>Tringa glareola</i>          | wet    | long     | 0.367 | 4.21 | 60.66 | -0.04847 | 0.05765  |
| <i>Phalaropus lobatus</i>       | wet    | long     | 0.192 | 3.52 | 65.54 | 0.02899  | 0.01902  |
| <i>Larus melanocephalus</i>     | wet    | short    | 0.082 | 5.55 | 47.10 | -0.02479 | 0.17520  |
| <i>Jynx torquilla</i>           | forest | long     | 1.394 | 3.51 | 52.83 | -0.09484 | -0.08468 |
| <i>Lullula arborea</i>          | open   | short    | 1.160 | 3.29 | 47.75 | -0.02601 | 0.08627  |
| <i>Phoenicurus ochruros</i>     | open   | short    | 1.246 | 2.80 | 47.74 | -0.01751 | -0.03473 |
| <i>Turdus pilaris</i>           | open   | short    | 1.057 | 4.66 | 56.39 | -0.10727 | -0.01771 |
| <i>Turdus iliacus</i>           | forest | short    | 0.563 | 4.11 | 59.79 | -0.08011 | -0.05566 |
| <i>Cettia cetti</i>             | wet    | resident | 0.532 | 2.66 | 41.92 | 0.04868  | 0.08203  |
| <i>Locustella luscinioides</i>  | wet    | long     | 0.627 | 2.71 | 48.79 | -0.01464 | -0.06530 |
| <i>Acrocephalus palustris</i>   | open   | long     | 0.967 | 2.42 | 51.56 | -0.06818 | -0.04904 |
| <i>Sylvia undata</i>            | open   | resident | 0.353 | 2.38 | 41.88 | 0.04504  | 0.07986  |
| <i>Regulus ignicapillus</i>     | forest | short    | 0.857 | 1.72 | 46.69 | -0.01795 | 0.03878  |
| <i>Panurus biarmicus</i>        | wet    | short    | 0.300 | 2.75 | 48.11 | 0.01296  | -0.00887 |
| <i>Oriolus oriolus</i>          | forest | long     | 1.321 | 4.37 | 49.24 | -0.04778 | -0.02016 |
| <i>Lanius collurio</i>          | open   | long     | 1.400 | 3.40 | 51.06 | -0.09776 | -0.09683 |
| <i>Fringilla montifringilla</i> | forest | short    | 0.393 | 3.18 | 62.09 | -0.11719 | -0.06298 |
| <i>Serinus serinus</i>          | open   | short    | 1.172 | 2.42 | 46.01 | -0.00956 | -0.08187 |
| <i>Carpodacus erythrinus</i>    | open   | long     | 0.579 | 3.18 | 56.43 | -0.21929 | 0.03576  |
| <i>Plectrophenax nivalis</i>    | open   | short    | 0.174 | 3.74 | 67.45 | -0.06720 | 0.01581  |
| <i>Emberiza cirulus</i>         | open   | resident | 0.640 | 3.14 | 42.71 | 0.02560  | 0.08792  |
